# Supplementary material
Source: PubMed Central journal article supplement (PMC11027651)
Supplement: 262_2020_2560_MOESM1_ESM.pdf [file 262_2020_2560_MOESM1_ESM.pdf]

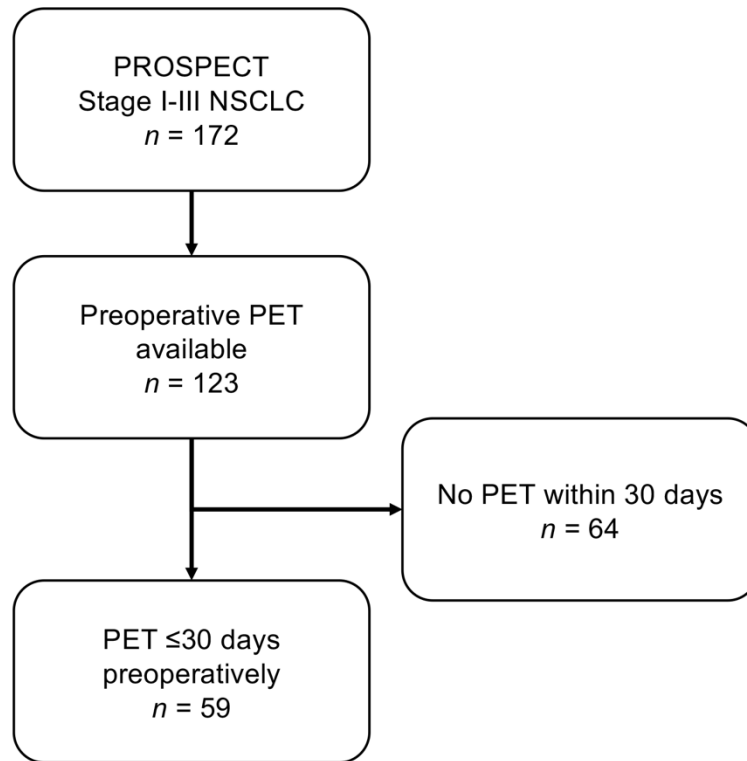

**Supplementary Fig. 1 Consolidated Standards of Reporting Trials (CONSORT) diagram outlining the identification of eligible patients in the PROSPECT cohort.**

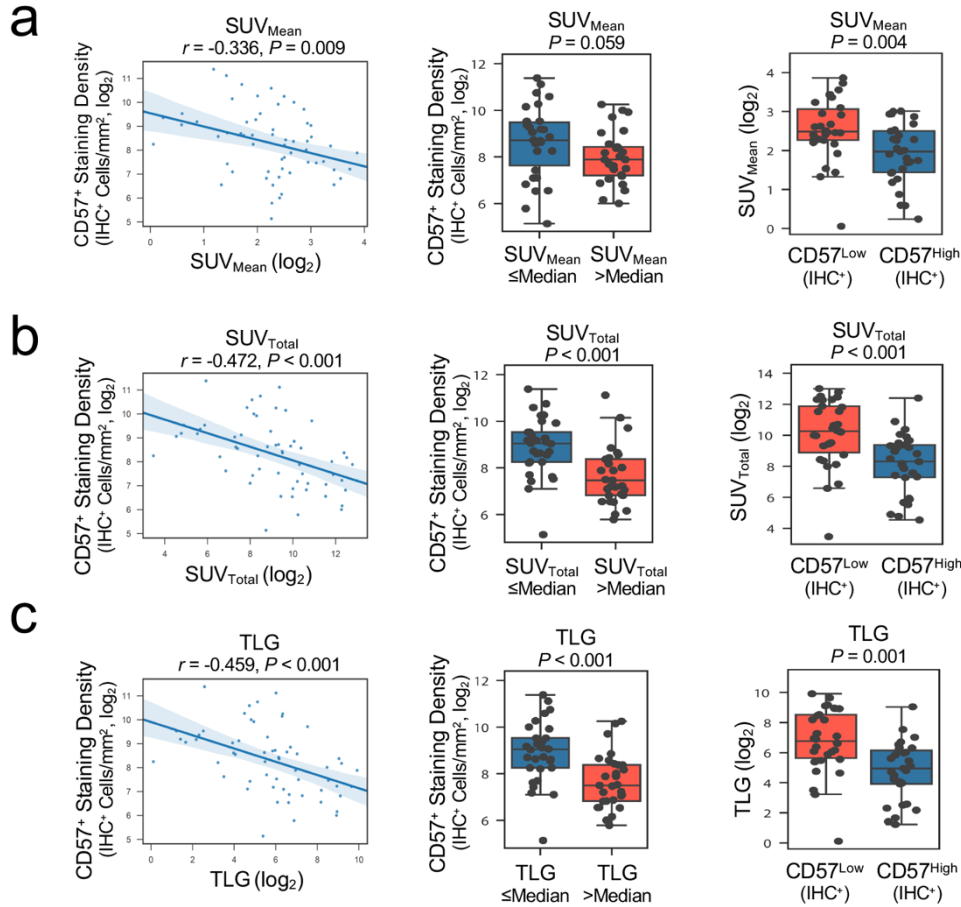

**Supplementary Fig. 2 Elevated preoperative <sup>18</sup>F-FDG PET retention is associated with reduced intratumoral CD57<sup>+</sup> immune cell infiltration ( $n = 59$ ).** **a-c**, associations between enhanced tumor <sup>18</sup>F-FDG avidity according to (a) SUV<sub>Mean</sub>, (b) SUV<sub>Total</sub>, and (c) TLG and reduced intratumoral infiltration by immune cells expressing CD57. Values provided in **a-c** (left panels) are Pearson coefficients for pairwise correlations between log<sub>2</sub>-transformed values; a two-tailed  $P$  value of 0.05 was used to determine statistical significance. In **a-c** (center and right panels), boxes depict median and interquartile range (IQR); bars represent minimum and maximum values excluding outliers (median  $\pm$  1.5 IQR).  $P$  values in the center and right panels were calculated using unpaired  $t$  tests. The cohort was dichotomized according to the median of each parameter (center panels; SUV<sub>Mean</sub>, 4.90; SUV<sub>Total</sub>, 643.26; TLG, 64.72) and density of cells expressing CD57 (right panels, 330.4 cells/mm<sup>2</sup>).

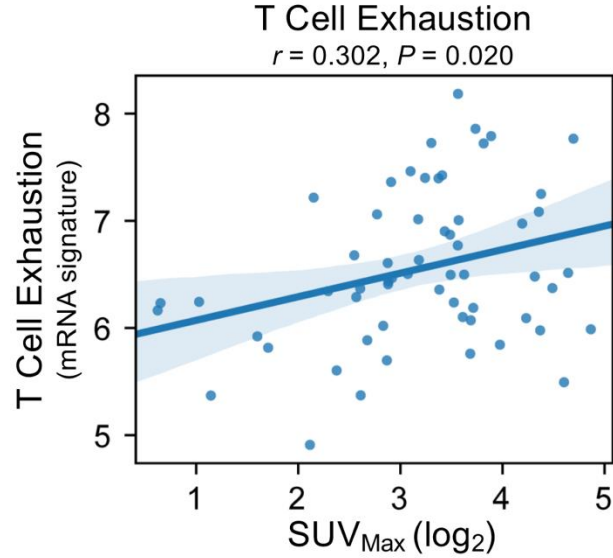

**Supplementary Fig. 3 Association between increased <sup>18</sup>F-FDG retention as quantified by SUV<sub>Max</sub> and expression of a gene signature indicative of T cell exhaustion in NSCLC patients ( $n = 59$ ).** The provided value is the Pearson coefficient for pairwise correlation between log<sub>2</sub>-transformed values; a two-tailed  $P$  value of 0.05 was used to determine statistical significance. The T cell exhaustion signature was quantified as the mean overall expression level of *CTLA4*, *HAVCR2*, *LAG3*, *PDCD1*, and *TIGIT*. *CTLA4*, cytotoxic T-lymphocyte associated protein 4; *HAVCR2*, hepatitis A virus cellular receptor 2; *PDCD1*, programmed cell death 1.

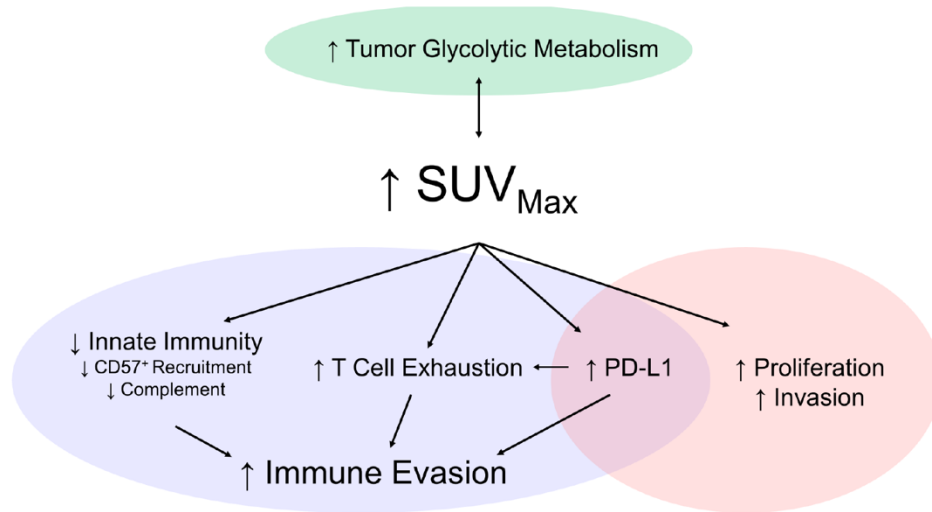

**Supplementary Fig. 4 Proposed model depicting the associations between SUV<sub>Max</sub> with tumor immune and metabolic phenotypes in resected NSCLC.**

**Supplementary Table 1 Clinicopathologic and treatment characteristics of patients in the PROSPECT cohort (n = 59).** ECOG, Eastern Cooperative Oncology Group; NH, non-Hispanic.

| <b>Variable</b>                                | <b>n (%)</b> |
|------------------------------------------------|--------------|
| <b>Age ≥ 65 years</b>                          | 27 (46)      |
| <b>Sex</b>                                     |              |
| Male                                           | 34 (58)      |
| Female                                         | 25 (42)      |
| <b>ECOG Performance Status</b>                 |              |
| 0                                              | 29 (49)      |
| 1                                              | 27 (46)      |
| 2                                              | 3 (5)        |
| <b>Race</b>                                    |              |
| NH Black                                       | 5 (9)        |
| NH White                                       | 49 (83)      |
| Asian                                          | 1 (2)        |
| Hispanic                                       | 4 (7)        |
| <b>Smoking Status</b>                          |              |
| Former/Current                                 | 52 (88)      |
| Never                                          | 7 (12)       |
| <b>Histology</b>                               |              |
| Adenocarcinoma                                 | 43 (73)      |
| Squamous Cell Carcinoma                        | 16 (27)      |
| <b>Differentiation</b>                         |              |
| Well/Moderate                                  | 35 (59)      |
| Poor                                           | 24 (41)      |
| <b>Clinical Stage</b>                          |              |
| I                                              | 34 (58)      |
| II                                             | 14 (24)      |
| III                                            | 11 (19)      |
| <b>Neoadjuvant Platinum-Based Chemotherapy</b> | 10 (17)      |
| <b>Pathologic Stage</b>                        |              |
| I                                              | 32 (54)      |
| II                                             | 12 (20)      |
| III                                            | 15 (25)      |
| <b>Adjuvant Therapy</b>                        |              |
| Systemic Therapy <sup>a</sup>                  | 20 (34)      |
| Radiotherapy                                   | 6 (10)       |

<sup>a</sup>Of the 20 patients who received adjuvant systemic therapy, 18/20 (90.0%) received adjuvant platinum-based chemotherapy, and 2/20 (10.0%) received neoadjuvant platinum-based chemotherapy and adjuvant erlotinib.

**Supplementary Table 2 Pairwise correlations between overall tumor glycolysis gene expression and expression of immune-related genes ( $n = 59$ ).** A false discovery rate-adjusted two-tailed  $P$  value of 0.05 was used to determine statistical significance. FDR, false discovery rate.

| <b>Gene</b>     | <b>Pearson's <math>r</math></b> | <b>FDR-adjusted <math>P</math></b> |
|-----------------|---------------------------------|------------------------------------|
| <i>GPI</i>      | 0.833                           | 0.000                              |
| <i>MIF</i>      | 0.668                           | 0.000                              |
| <i>F12</i>      | 0.602                           | 0.000                              |
| <i>MAP3K1</i>   | -0.605                          | 0.000                              |
| <i>A2M</i>      | -0.589                          | 0.000                              |
| <i>CDK1</i>     | 0.565                           | 0.000                              |
| <i>SERPINB2</i> | 0.565                           | 0.000                              |
| <i>CD55</i>     | -0.550                          | 0.000                              |
| <i>PSMB7</i>    | 0.550                           | 0.000                              |
| <i>IL1RAP</i>   | 0.543                           | 0.001                              |
| <i>MEF2C</i>    | -0.533                          | 0.001                              |
| <i>C5</i>       | -0.524                          | 0.001                              |
| <i>ATG5</i>     | -0.517                          | 0.001                              |
| <i>CREB1</i>    | -0.520                          | 0.001                              |
| <i>LRRN3</i>    | -0.518                          | 0.001                              |
| <i>TFRC</i>     | 0.513                           | 0.001                              |
| <i>C1QBP</i>    | 0.510                           | 0.001                              |
| <i>RELA</i>     | 0.512                           | 0.001                              |
| <i>IL1A</i>     | 0.508                           | 0.001                              |
| <i>IFNAR2</i>   | -0.505                          | 0.002                              |
| <i>IL1B</i>     | 0.498                           | 0.002                              |
| <i>IL10</i>     | -0.496                          | 0.002                              |
| <i>ATG10</i>    | -0.489                          | 0.003                              |
| <i>CXCL16</i>   | -0.485                          | 0.003                              |
| <i>CCL26</i>    | 0.483                           | 0.003                              |
| <i>BIRC5</i>    | 0.479                           | 0.003                              |
| <i>CEACAM6</i>  | -0.479                          | 0.003                              |
| <i>IL18</i>     | -0.477                          | 0.003                              |
| <i>CDH5</i>     | -0.471                          | 0.004                              |
| <i>NFKBIA</i>   | -0.470                          | 0.004                              |
| <i>STAT5B</i>   | -0.458                          | 0.006                              |
| <i>CCND3</i>    | -0.457                          | 0.006                              |
| <i>ELANE</i>    | -0.452                          | 0.007                              |
| <i>MAPK3</i>    | -0.453                          | 0.007                              |
| <i>PRKCD</i>    | -0.445                          | 0.008                              |
| <i>TXNIP</i>    | -0.446                          | 0.008                              |

|                 |        |       |
|-----------------|--------|-------|
| <i>DUSP6</i>    | -0.444 | 0.008 |
| <i>IL4R</i>     | -0.441 | 0.009 |
| <i>SPN</i>      | -0.440 | 0.009 |
| <i>TTK</i>      | 0.439  | 0.009 |
| <i>PSMD7</i>    | 0.437  | 0.009 |
| <i>TNFRSF18</i> | 0.433  | 0.010 |
| <i>C4BPA</i>    | -0.429 | 0.011 |
| <i>MAP2K1</i>   | 0.429  | 0.011 |
| <i>CD34</i>     | -0.426 | 0.012 |
| <i>RELB</i>     | 0.426  | 0.012 |
| <i>SYT17</i>    | -0.422 | 0.013 |
| <i>TNFSF15</i>  | -0.422 | 0.013 |
| <i>CCL11</i>    | 0.411  | 0.018 |
| <i>CD274</i>    | 0.408  | 0.018 |
| <i>IL17F</i>    | -0.408 | 0.018 |
| <i>BID</i>      | 0.406  | 0.019 |
| <i>ATG12</i>    | -0.405 | 0.020 |
| <i>CCR6</i>     | -0.404 | 0.020 |
| <i>CD1C</i>     | -0.403 | 0.020 |
| <i>JAM3</i>     | -0.402 | 0.020 |
| <i>TNFRSF14</i> | -0.400 | 0.021 |
| <i>NFATC3</i>   | -0.399 | 0.022 |
| <i>IFI16</i>    | 0.394  | 0.024 |
| <i>ITGB4</i>    | 0.394  | 0.024 |
| <i>CCL14</i>    | -0.392 | 0.025 |
| <i>EWSR1</i>    | 0.385  | 0.029 |
| <i>IRAK1</i>    | 0.385  | 0.029 |
| <i>CTSH</i>     | -0.383 | 0.031 |
| <i>DPP4</i>     | -0.382 | 0.031 |
| <i>IL17B</i>    | -0.381 | 0.031 |
| <i>PLAU</i>     | 0.381  | 0.031 |
| <i>C6</i>       | -0.379 | 0.032 |
| <i>FOXJ1</i>    | -0.371 | 0.038 |
| <i>IFNAR1</i>   | -0.371 | 0.038 |
| <i>MAGEB2</i>   | 0.371  | 0.038 |
| <i>RRAD</i>     | -0.370 | 0.039 |
| <i>CXCL2</i>    | -0.368 | 0.040 |
| <i>IL1R1</i>    | -0.368 | 0.040 |
| <i>C7</i>       | -0.365 | 0.040 |
| <i>NEFL</i>     | 0.365  | 0.040 |
| <i>NUP107</i>   | 0.367  | 0.040 |
| <i>PECAM1</i>   | -0.366 | 0.040 |
| <i>TLR5</i>     | -0.366 | 0.040 |

|                |        |       |
|----------------|--------|-------|
| <i>HLA-DMB</i> | -0.362 | 0.043 |
| <i>PBK</i>     | 0.358  | 0.047 |
| <i>ATF2</i>    | 0.355  | 0.049 |
| <i>C4B</i>     | -0.355 | 0.049 |
| <i>EP300</i>   | 0.354  | 0.050 |

---



**Supplementary Table 3 Pairwise correlations between preoperative SUV<sub>Max</sub> and expression of immune-related genes (*n* = 59).** A false discovery rate-adjusted two-tailed *P* value of 0.05

was used to determine statistical significance. FDR, false discovery rate.

| <b>Gene</b>    | <b>Pearson's <i>r</i></b> | <b>FDR-adjusted <i>P</i></b> |
|----------------|---------------------------|------------------------------|
| <i>PBK</i>     | 0.543                     | 0.003                        |
| <i>PLA2G1B</i> | -0.548                    | 0.003                        |
| <i>ICAM4</i>   | -0.522                    | 0.005                        |
| <i>TTK</i>     | 0.514                     | 0.005                        |
| <i>BIRC5</i>   | 0.488                     | 0.012                        |
| <i>CDK1</i>    | 0.474                     | 0.018                        |
| <i>C5</i>      | -0.457                    | 0.019                        |
| <i>CCND3</i>   | -0.453                    | 0.019                        |
| <i>CD1C</i>    | -0.452                    | 0.019                        |
| <i>CD3EAP</i>  | 0.453                     | 0.019                        |
| <i>IL2RA</i>   | 0.460                     | 0.019                        |
| <i>KIT</i>     | -0.453                    | 0.019                        |
| <i>S100A8</i>  | 0.450                     | 0.019                        |
| <i>CTSH</i>    | -0.443                    | 0.022                        |
| <i>TFRC</i>    | 0.434                     | 0.028                        |
| <i>IL1A</i>    | 0.421                     | 0.039                        |
| <i>PRKCE</i>   | -0.417                    | 0.042                        |
| <i>CD55</i>    | -0.412                    | 0.044                        |
| <i>RRAD</i>    | -0.412                    | 0.044                        |
| <i>PSEN1</i>   | -0.410                    | 0.044                        |
| <i>ICAM2</i>   | -0.407                    | 0.046                        |

**Supplementary Table 4 Pairwise correlations between preoperative SUV<sub>Mean</sub> and expression of immune-related genes (*n* = 59).** A false discovery rate-adjusted two-tailed *P* value of 0.05 was used to determine statistical significance. FDR, false discovery rate.

| <b>Gene</b>    | <b>Pearson's<br/><i>r</i></b> | <b>FDR-adjusted<br/><i>P</i></b> |
|----------------|-------------------------------|----------------------------------|
| <i>BIRC5</i>   | 0.519                         | 0.004                            |
| <i>ICAM4</i>   | -0.519                        | 0.004                            |
| <i>PBK</i>     | 0.531                         | 0.004                            |
| <i>PLA2G1B</i> | -0.535                        | 0.004                            |
| <i>TTK</i>     | 0.499                         | 0.008                            |
| <i>C5</i>      | -0.469                        | 0.021                            |
| <i>IL2RA</i>   | 0.460                         | 0.025                            |
| <i>PRKCE</i>   | -0.450                        | 0.031                            |
| <i>CD3EAP</i>  | 0.435                         | 0.031                            |
| <i>CDK1</i>    | 0.436                         | 0.031                            |
| <i>CTSH</i>    | -0.436                        | 0.031                            |
| <i>KIT</i>     | -0.443                        | 0.031                            |
| <i>MUC1</i>    | -0.441                        | 0.031                            |
| <i>STAT6</i>   | -0.432                        | 0.032                            |
| <i>MAGEA1</i>  | 0.423                         | 0.039                            |

**Supplementary Table 5 Pairwise correlations between preoperative SUV<sub>Total</sub> and expression of immune-related genes ( $n = 59$ ).** A false discovery rate-adjusted two-tailed  $P$  value of 0.05 was used to determine statistical significance. FDR, false discovery rate.

| <b>Gene</b>    | <b>Pearson's<br/><i>r</i></b> | <b>FDR-adjusted<br/><i>P</i></b> |
|----------------|-------------------------------|----------------------------------|
| <i>ICAM4</i>   | -0.520                        | 0.011                            |
| <i>PLA2G1B</i> | -0.515                        | 0.011                            |
| <i>CREBBP</i>  | -0.492                        | 0.018                            |
| <i>C5</i>      | -0.453                        | 0.045                            |
| <i>LRRN3</i>   | -0.456                        | 0.045                            |
| <i>CCND3</i>   | -0.446                        | 0.048                            |

**Supplementary Table 6** Pairwise correlations between preoperative TLG and expression of immune-related genes ( $n = 59$ ). A false discovery rate-adjusted two-tailed  $P$  value of 0.05 was used to determine statistical significance. FDR, false discovery rate.

| <b>Gene</b>    | <b>Pearson's<br/><i>r</i></b> | <b>FDR-adjusted<br/><i>P</i></b> |
|----------------|-------------------------------|----------------------------------|
| <i>PLA2G1B</i> | -0.516                        | 0.011                            |
| <i>ICAM4</i>   | -0.514                        | 0.011                            |
| <i>CREBBP</i>  | -0.491                        | 0.018                            |

**Supplementary Table 7 Dysregulated genes according to elevated overall tumor expression of glycolytic genes (dichotomized according to the median among the entire cohort;  $n = 59$ ).**

Genes were considered dysregulated if  $|\log\text{-fold change}| > 1$  and two-tailed  $P < 0.05$ .

| <b>Gene</b>     | <b>Log-fold change</b> | <b><i>P</i></b> |
|-----------------|------------------------|-----------------|
| <i>IL1A</i>     | 1.777                  | 0.000           |
| <i>S100A8</i>   | 1.389                  | 0.004           |
| <i>SERPINB2</i> | 1.377                  | 0.001           |
| <i>F12</i>      | 1.325                  | 0.000           |
| <i>IL1B</i>     | 1.246                  | 0.000           |
| <i>DEFB1</i>    | 1.220                  | 0.035           |
| <i>CDK1</i>     | 1.198                  | 0.000           |
| <i>GPI</i>      | 1.126                  | 0.000           |
| <i>SPP1</i>     | 1.126                  | 0.010           |
| <i>MAGEA4</i>   | 1.124                  | 0.049           |
| <i>BIRC5</i>    | 1.116                  | 0.002           |
| <i>TTK</i>      | 1.106                  | 0.000           |
| <i>ITGB4</i>    | 1.093                  | 0.002           |
| <i>S100A7</i>   | 1.083                  | 0.006           |
| <i>PBK</i>      | 1.020                  | 0.003           |
| <i>C4BPA</i>    | -2.305                 | 0.000           |
| <i>CEACAM6</i>  | -2.176                 | 0.000           |
| <i>PLA2G1B</i>  | -1.417                 | 0.005           |
| <i>A2M</i>      | -1.378                 | 0.000           |
| <i>C5</i>       | -1.231                 | 0.000           |
| <i>CCL14</i>    | -1.189                 | 0.002           |
| <i>CDH5</i>     | -1.091                 | 0.000           |
| <i>KIT</i>      | -1.063                 | 0.010           |
| <i>C7</i>       | -1.060                 | 0.007           |
| <i>DPP4</i>     | -1.009                 | 0.003           |

**Supplementary Table 8 Dysregulated genes according to elevated preoperative SUV<sub>Max</sub>**

**(dichotomized according to the median among the entire cohort, 10.36;  $n = 59$ ).** Genes were

considered dysregulated if  $|\log\text{-fold change}| > 1$  and two-tailed  $P < 0.05$ .

| <b>Gene</b>    | <b>Log-fold change</b> | <b><i>P</i></b> |
|----------------|------------------------|-----------------|
| <i>SPP1</i>    | 1.340                  | 0.002           |
| <i>PBK</i>     | 1.246                  | 0.000           |
| <i>IL1A</i>    | 1.195                  | 0.007           |
| <i>S100A8</i>  | 1.126                  | 0.019           |
| <i>BIRC5</i>   | 1.018                  | 0.005           |
| <i>F12</i>     | 1.004                  | 0.002           |
| <i>PLA2G1B</i> | -1.712                 | 0.001           |
| <i>C4BPA</i>   | -1.353                 | 0.021           |
| <i>KIT</i>     | -1.146                 | 0.005           |
| <i>FCERIA</i>  | -1.068                 | 0.006           |
| <i>RRAD</i>    | -1.007                 | 0.005           |

**Supplementary Table 9 Classification of NSCLC tumors in the study cohort according to overall tumor expression of glycolytic genes and SUV<sub>Max</sub> (*n* = 59).** The cohort was dichotomized according to the median value of each parameter among the entire cohort.

|                                          |      | SUV <sub>Max</sub> |           | Total |
|------------------------------------------|------|--------------------|-----------|-------|
|                                          |      | High               | Low       |       |
| Overall Tumor Glycolytic Gene Expression | High | 20 (69.0)          | 9 (30.0)  | 29    |
|                                          | Low  | 9 (30.0)           | 21 (70.0) | 30    |
| Total                                    |      | 29                 | 30        |       |

**Supplementary Table 10 Dysregulated genes according to elevated preoperative SUV<sub>Mean</sub>, SUV<sub>Total</sub>, and TLG (n = 59).** The cohort was dichotomized according to the median value of each parameter among the entire cohort (SUV<sub>Mean</sub>, 4.90; SUV<sub>Total</sub>, 643.26; TLG, 64.72). Genes were considered dysregulated if  $|\log\text{-fold change}| > 1$  and two-tailed  $P < 0.05$ . LFC, log-fold change.

| SUV <sub>Mean</sub> |        |       | SUV <sub>Total</sub> |        |       | TLG            |        |       |
|---------------------|--------|-------|----------------------|--------|-------|----------------|--------|-------|
| Gene                | LFC    | P     | Gene                 | LFC    | P     | Gene           | LFC    | P     |
| <i>MAGEA4</i>       | 1.309  | 0.021 | <i>ITGB4</i>         | 1.197  | 0.001 | <i>PLA2G1B</i> | -1.387 | 0.006 |
| <i>CXCL10</i>       | 1.275  | 0.003 | <i>IL1A</i>          | 1.026  | 0.022 |                |        |       |
| <i>S100A8</i>       | 1.235  | 0.010 | <i>MAGEA1</i>        | 1.005  | 0.005 |                |        |       |
| <i>CXCL9</i>        | 1.230  | 0.012 | <i>PLA2G1B</i>       | -1.229 | 0.015 |                |        |       |
| <i>CXCL13</i>       | 1.148  | 0.019 | <i>LRRN3</i>         | -1.081 | 0.000 |                |        |       |
| <i>PBK</i>          | 1.073  | 0.002 |                      |        |       |                |        |       |
| <i>PLA2G1B</i>      | -1.534 | 0.002 |                      |        |       |                |        |       |
| <i>C4BPA</i>        | -1.452 | 0.013 |                      |        |       |                |        |       |
| <i>CEACAM6</i>      | -1.256 | 0.048 |                      |        |       |                |        |       |
| <i>C5</i>           | -1.006 | 0.003 |                      |        |       |                |        |       |
